# Supplementary material for: auts2 Features and Expression Are Highly Conserved during Evolution Despite Different Evolutionary Fates Following Whole Genome Duplication
Source: MDPI journal article supplement (doi:10.3390/cells11172694), 2022-08-30
Supplement: s1 [file s1]

auts2b\_D.rerio\_exon9  
A.anguilla\_12:5647264-5647247  
C.harengus\_NW\_012221820.1:1032  
O.latipes\_13:12365425-12369417  
S.maximus\_3:11933378-11933316  
X.maculatus\_18:25652475-256525  
G.aculeatus\_groupI:10844121-10  
T.nigroviridis\_16:2661543-2661  
O.niloticus\_LG14:25797068-2579  
A.percula\_9:2132141-2132197

KPGKWCAMHVHIAWQVYHHQQKIK  
-----HVHICW-----  
RPRGWYAMHVTIAWQVYLQQQKAK  
--GKGGAHVHIAWGIYFHKQ---  
KRGRLGALHVCIAWKIYYHKQ---  
-----LHVYIAWRIYYHKQ---  
KRVRWSALHVGIAWRIYYHKQ---  
---RWGALHVRIAWKIYHHKQ---  
RRGRWGALHVCIAWKIYYHKQ---  
--GRWGALHVCIAWKIHYHKQ---

auts2a\_P.nattereri\_exon7  
A.mexicanus\_20:12208335-122083

KPGKWCAMHVHIAWQIYHHQQKKGK  
-----IHKHICWQ-----

auts2a\_E.electricus\_exon10  
P.hypophthalmus\_17:8831365-883  
I.punctatus\_16:18136191-181362  
I.punctatus\_16:21823263-191704  
I.punctatus\_KV453361.1:77808-7  
I.punctatus\_KV453361.1:84208-8

KPGKWCAMHVHIAWQIYHHQQKKGK  
-----HNHICW-----  
-----HVHITWN-----  
-----HVHINWN-----  
-----VHIAW-----  
-----QIYHH-----
