# Supplementary material for: auts2 Features and Expression Are Highly Conserved during Evolution Despite Different Evolutionary Fates Following Whole Genome Duplication
Source: MDPI journal article supplement (doi:10.3390/cells11172694), 2022-08-30
Supplement: s1 [file s1]

[illegible][illegible]

AUTS2 domain
