# Supplementary figures and images for: auts2 Features and Expression Are Highly Conserved during Evolution Despite Different Evolutionary Fates Following Whole Genome Duplication
Source: MDPI journal article supplement (doi:10.3390/cells11172694), 2022-08-30

A

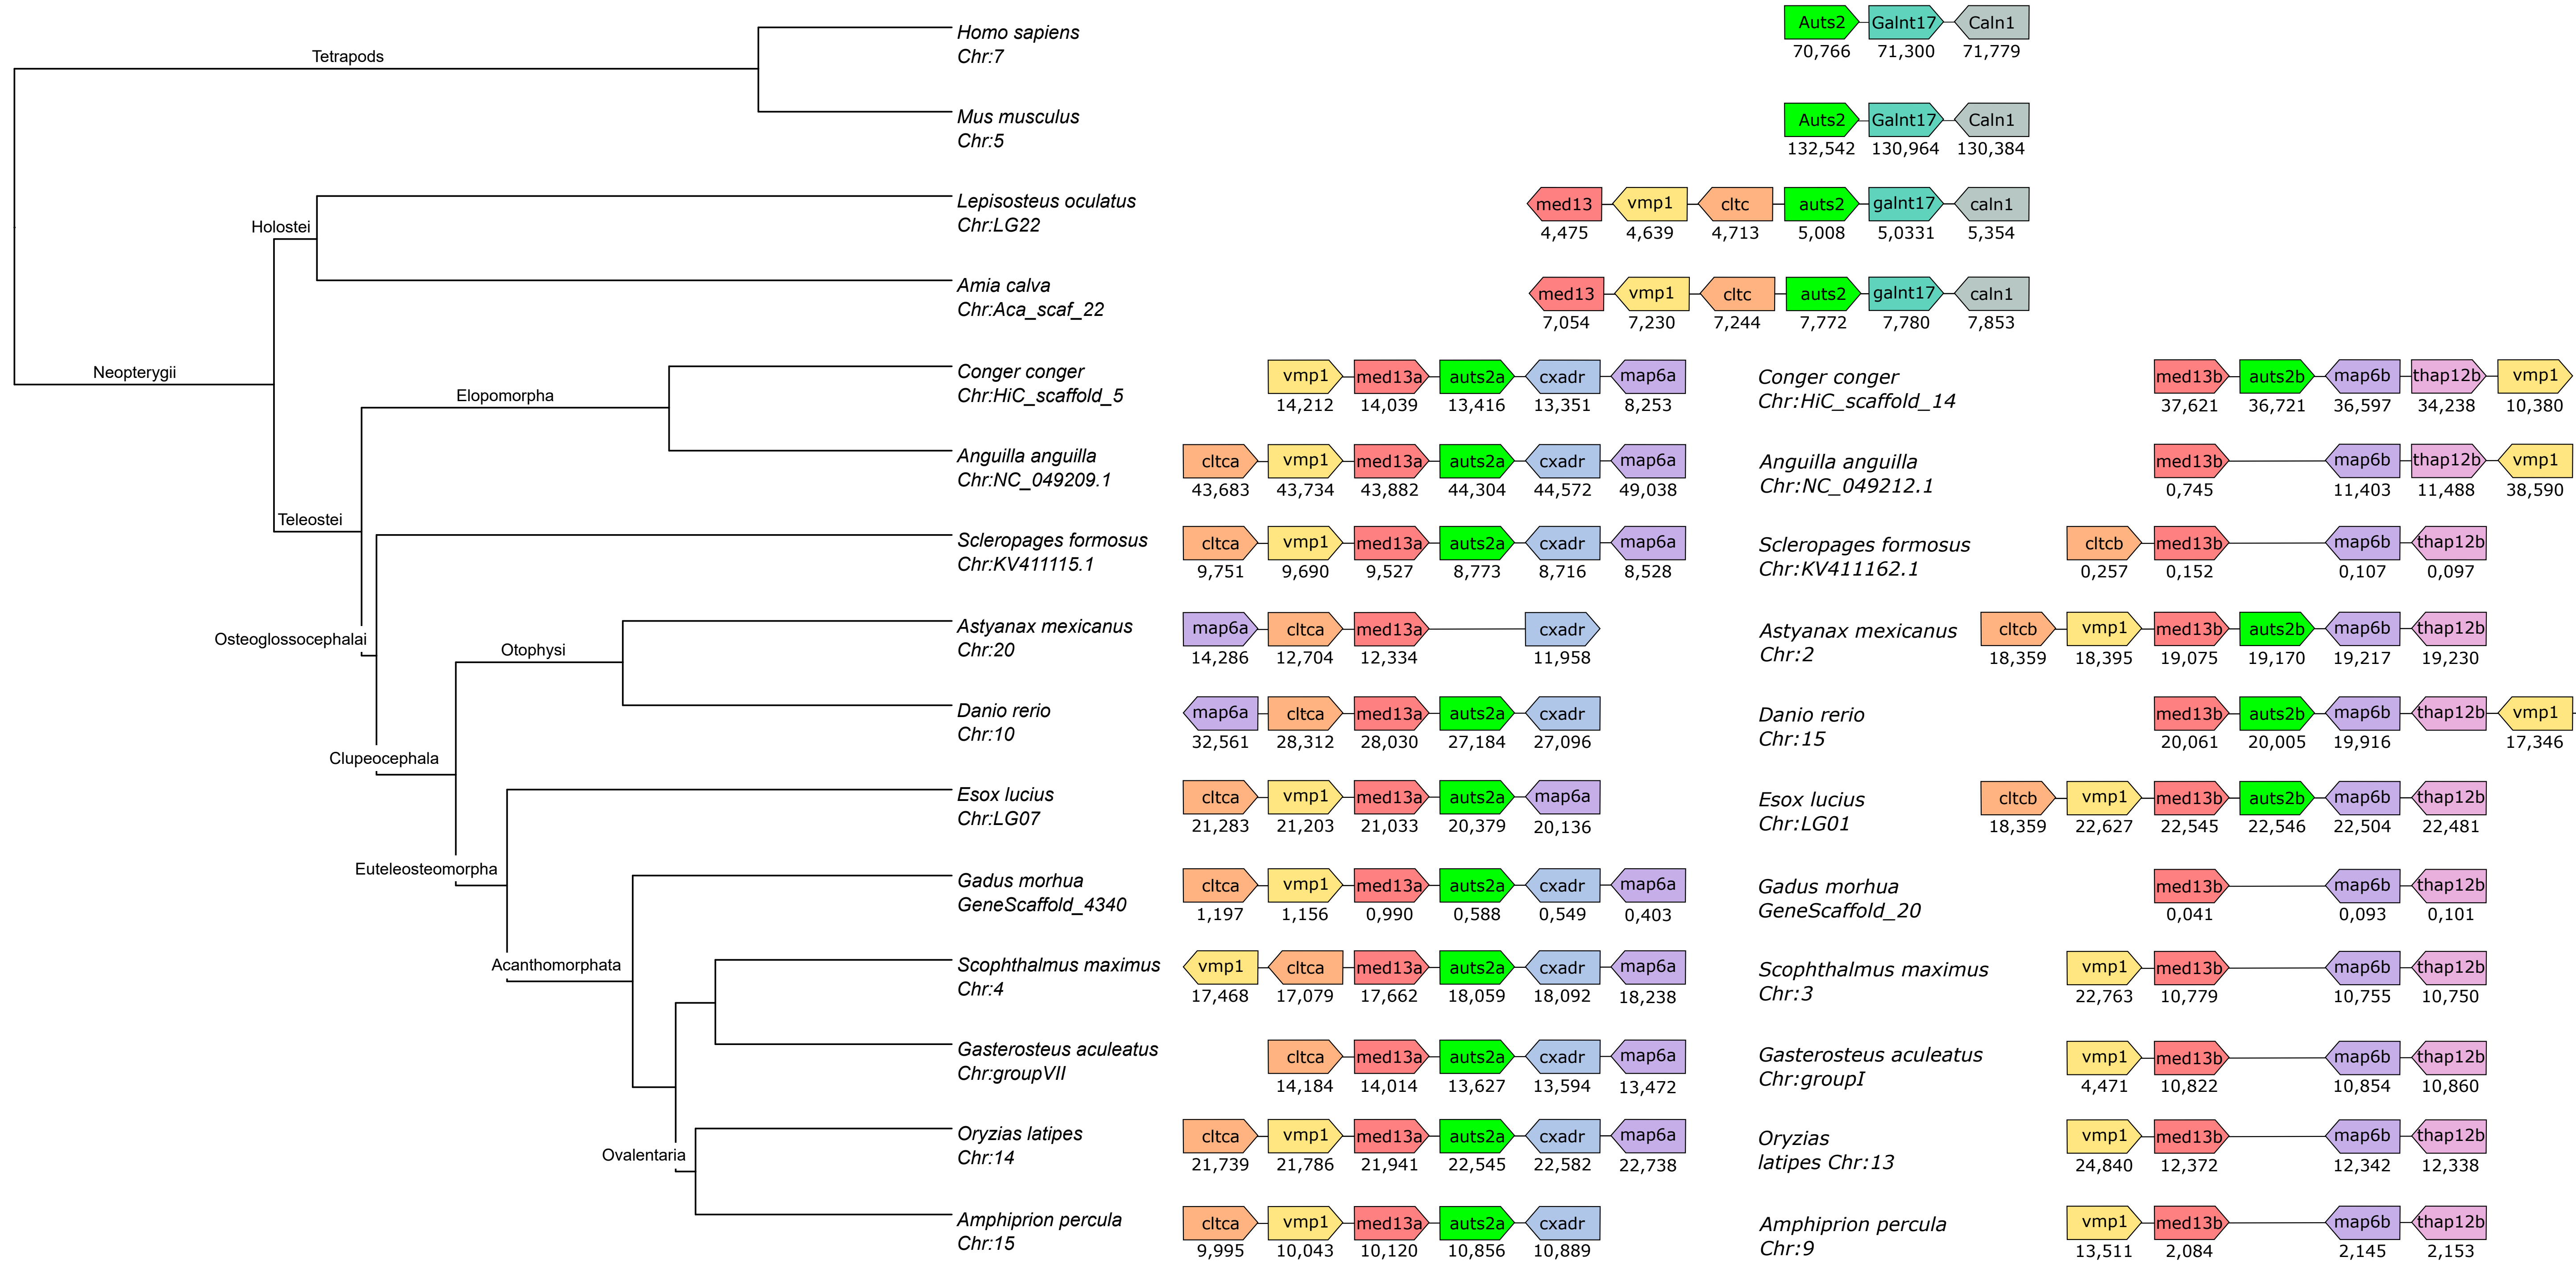

B

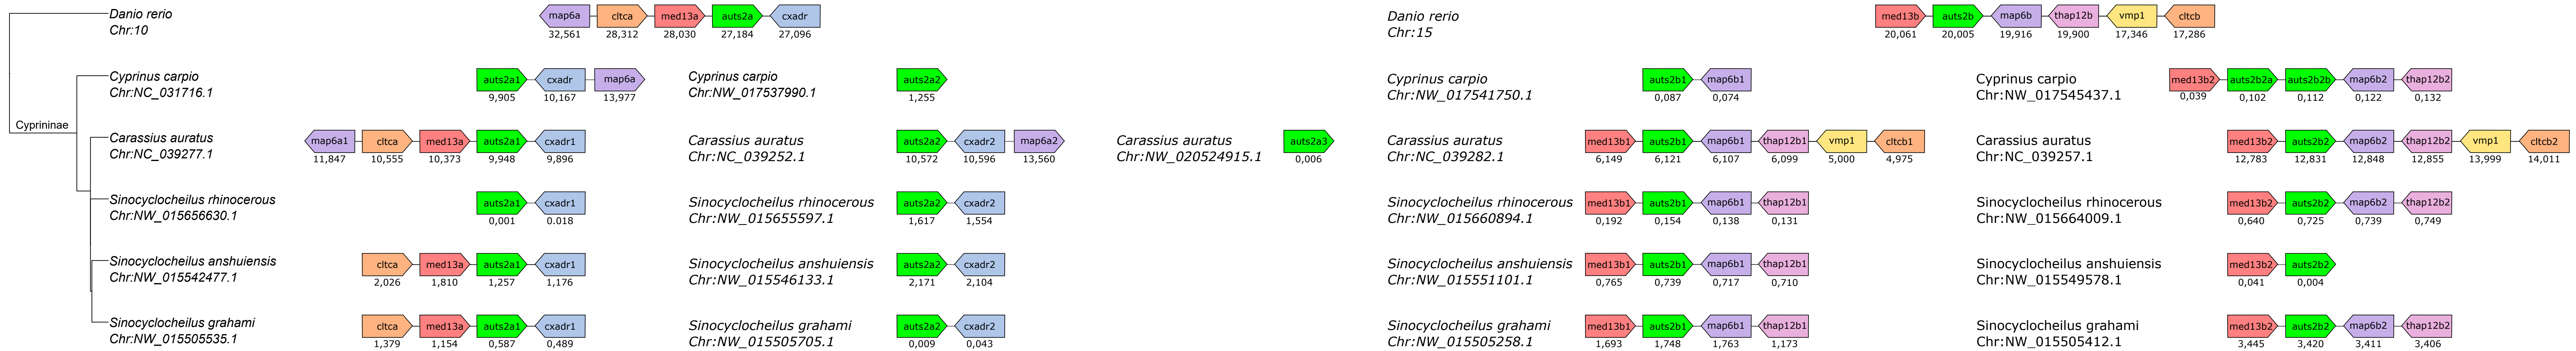

C

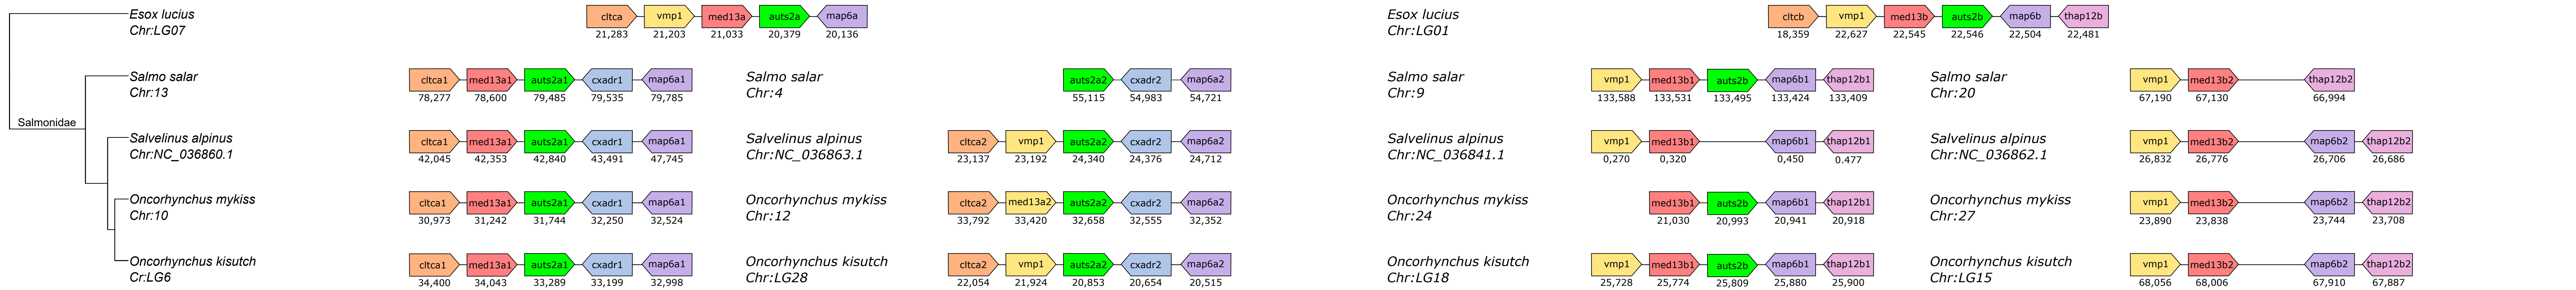

Supplement: s1 [file s1]

A

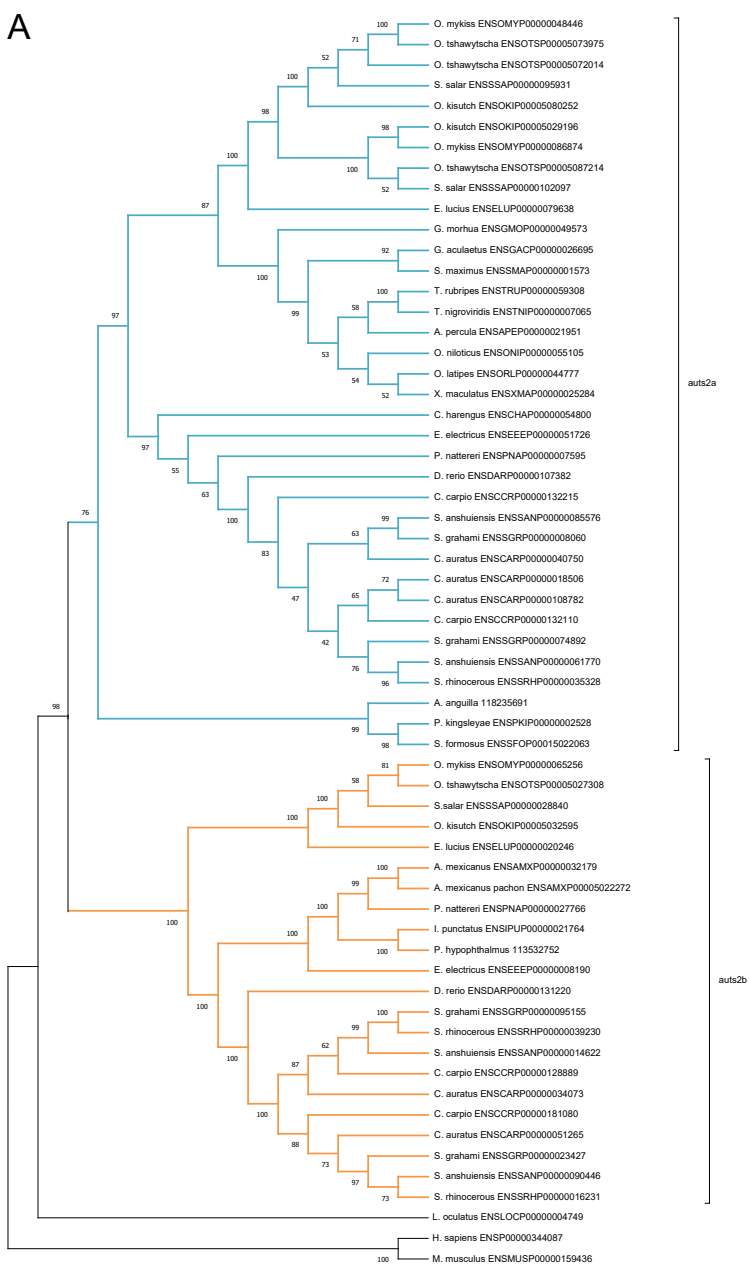

B

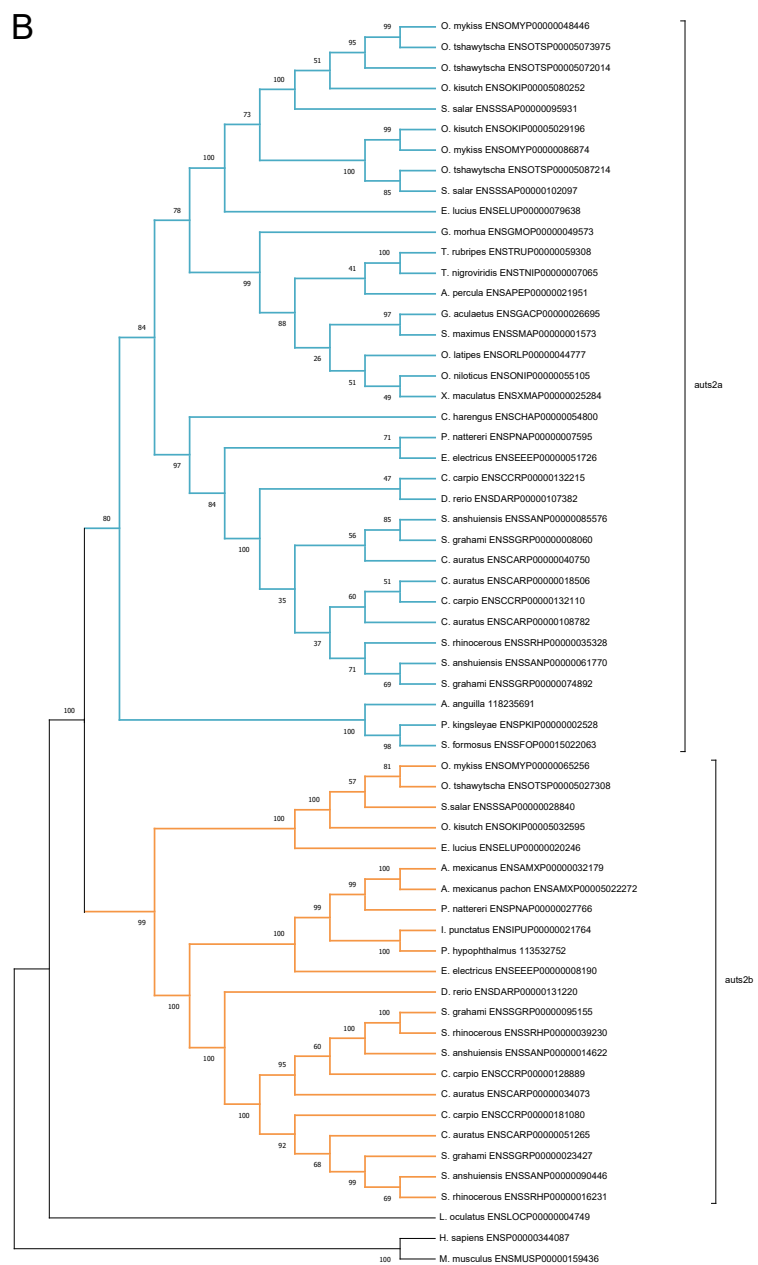

Supplement: s1 [file s1]
